# Supplementary material for: High-throughput screening of mechanically interlocked Catenane metal complexes for enhanced electrocatalytic activity
Source: Royal Society of Chemistry journal article supplement (doi:10.1039/d4ta06497f), 2024-01-01
Supplement: d4ta06497f2.pdf [file d4ta06497f2.pdf]

1 **Supporting Information**

2 **High-throughput Screening of Mechanically Interlocked Catenane Metal**  
3 **Complexes for Enhanced Electrocatalytic Activity**

4  
5 *Mohsen Tamtaji<sup>1</sup>, William A. Goddard III<sup>2\*</sup>, GuanHua Chen<sup>1,3\*</sup>*

6  
7 <sup>1</sup>Hong Kong Quantum AI Lab Limited, Pak Shek Kok, Hong Kong SAR, 999077, China

8 <sup>2</sup>Materials and Process Simulation Center (MSC), MC 139-74, California Institute of  
9 Technology, Pasadena CA, 91125, USA

10 <sup>3</sup>Department of Chemistry, The University of Hong Kong, Pokfulam Road, Hong Kong SAR,  
11 999077, China

12  
13 \*Corresponding Authors, email: [ghc@everest.hku.hk](mailto:ghc@everest.hku.hk) and [wag@caltech.edu](mailto:wag@caltech.edu)

1 **DFT calculations**

2 **Table S1.** Formation energies and dissolution potentials of metal complexes.

| <b>Metal complex</b>        | <b>E<sub>M</sub> (eV)*</b> | <b>Ne, ref.<sup>1</sup></b> | <b>U<sub>diso</sub> (V), ref.<sup>1</sup></b> | <b>E<sub>formation</sub> (eV)</b> | <b>U<sub>dis</sub> (V)</b> |
|-----------------------------|----------------------------|-----------------------------|-----------------------------------------------|-----------------------------------|----------------------------|
| <b>Cu(I)<sub>CN2</sub></b>  | -3.72                      | 2                           | 0.34                                          | -0.43                             | 0.56                       |
| <b>Cu(I)<sub>CN3</sub></b>  | -3.72                      | 2                           | 0.34                                          | -1.25                             | 0.97                       |
| <b>Cu(II)<sub>CN2</sub></b> | -3.72                      | 2                           | 0.34                                          | -0.59                             | 0.63                       |
| <b>Cu(II)<sub>CN3</sub></b> | -3.72                      | 2                           | 0.34                                          | -1.96                             | 1.32                       |
| <b>Cu(I)<sub>CN4</sub></b>  | -3.72                      | 2                           | 0.34                                          | -2.85                             | 1.76                       |
| <b>Cu(I)<sub>CN5</sub></b>  | -3.72                      | 2                           | 0.34                                          | -2.93                             | 1.80                       |
| <b>Cu(I)<sub>CN6</sub></b>  | -3.72                      | 2                           | 0.34                                          | -3.39                             | 2.04                       |
| <b>Cu(II)<sub>CN4</sub></b> | -3.72                      | 2                           | 0.34                                          | -3.15                             | 1.92                       |
| <b>Cu(II)<sub>CN5</sub></b> | -3.72                      | 2                           | 0.34                                          | -4.03                             | 2.35                       |
| <b>Cu(II)<sub>CN6</sub></b> | -3.72                      | 2                           | 0.34                                          | -4.61                             | 2.64                       |
| <b>Fe(II)<sub>CN4</sub></b> | -8.23                      | 2                           | -0.45                                         | -3.66                             | 1.38                       |
| <b>Fe(II)<sub>CN5</sub></b> | -8.23                      | 2                           | -0.45                                         | -4.47                             | 1.79                       |
| <b>Fe(II)<sub>CN6</sub></b> | -8.23                      | 2                           | -0.45                                         | -5.42                             | 2.26                       |
| <b>Co(II)<sub>CN4</sub></b> | -7.02                      | 2                           | -0.28                                         | -3.50                             | 1.47                       |
| <b>Co(II)<sub>CN5</sub></b> | -7.02                      | 2                           | -0.28                                         | -4.09                             | 1.76                       |
| <b>Co(II)<sub>CN6</sub></b> | -7.02                      | 2                           | -0.28                                         | -5.11                             | 2.27                       |
| <b>Ni(II)<sub>CN4</sub></b> | -5.47                      | 2                           | -0.26                                         | -3.36                             | 1.42                       |
| <b>Ni(II)<sub>CN5</sub></b> | -5.47                      | 2                           | -0.26                                         | -4.73                             | 2.11                       |
| <b>Ni(II)<sub>CN6</sub></b> | -5.47                      | 2                           | -0.26                                         | -5.44                             | 2.46                       |
| <b>Zn(II)<sub>CN4</sub></b> | -1.11                      | 2                           | -0.76                                         | -5.10                             | 1.79                       |
| <b>Zn(II)<sub>CN5</sub></b> | -1.11                      | 2                           | -0.76                                         | -5.58                             | 2.03                       |
| <b>Zn(II)<sub>CN6</sub></b> | -1.11                      | 2                           | -0.76                                         | -6.37                             | 2.42                       |
| <b>Cr(II)<sub>CN4</sub></b> | -9.51                      | 2                           | -0.91                                         | -4.17                             | 1.18                       |
| <b>Cr(II)<sub>CN5</sub></b> | -9.51                      | 2                           | -0.91                                         | -5.43                             | 1.80                       |
| <b>Cr(II)<sub>CN6</sub></b> | -9.51                      | 2                           | -0.91                                         | -6.96                             | 2.57                       |
| <b>Mn(II)<sub>CN4</sub></b> | -8.01                      | 2                           | -1.19                                         | -5.61                             | 1.62                       |
| <b>Mn(II)<sub>CN5</sub></b> | -8.01                      | 2                           | -1.19                                         | -6.24                             | 1.93                       |
| <b>Mn(II)<sub>CN6</sub></b> | -8.01                      | 2                           | -1.19                                         | -7.67                             | 2.64                       |
| <b>Ti(II)<sub>CN4</sub></b> | -7.84                      | 2                           | -1.63                                         | -5.25                             | 1.00                       |
| <b>Ti(II)<sub>CN5</sub></b> | -7.84                      | 2                           | -1.63                                         | -6.60                             | 1.67                       |
| <b>Ti(II)<sub>CN6</sub></b> | -7.84                      | 2                           | -1.63                                         | -8.19                             | 2.47                       |
| <b>V(II)<sub>CN4</sub></b>  | -8.99                      | 2                           | -1.18                                         | -4.56                             | 1.10                       |
| <b>V(II)<sub>CN5</sub></b>  | -8.99                      | 2                           | -1.18                                         | -5.95                             | 1.79                       |
| <b>V(II)<sub>CN6</sub></b>  | -8.99                      | 2                           | -1.18                                         | -7.77                             | 2.70                       |

3 \* Obtained in this work using PBE functional

4

1 **Table S2.** Linear relationship coefficients between the Gibbs free energy of reaction intermediates  
2 with the Gibbs free energy of OH\*.

| Intermediate    | Scaling relationship                            | R <sup>2</sup> value |
|-----------------|-------------------------------------------------|----------------------|
| OH              | $\Delta G_{OH} = 1.000\Delta G_{OH} + 0.000$    | 1.0000               |
| O               | $\Delta G_O = 1.470\Delta G_{OH} + 0.228$       | 0.7752               |
| OOH             | $\Delta G_{OOH} = 0.589\Delta G_{OH} + 0.844$   | 0.8435               |
| OO              | $\Delta G_{OO} = 0.028\Delta G_{OH} + 4.719$    | 0.0155               |
| H               | $\Delta G_H = -0.369\Delta G_{OH} + 1.335$      | 0.3502               |
| CO <sub>2</sub> | $\Delta G_{CO_2} = -0.015\Delta G_{OH} + 0.450$ | 0.0139               |
| COOH            | $\Delta G_{COOH} = 0.214\Delta G_{OH} + 1.781$  | 0.1804               |
| CO              | $\Delta G_{CO} = 0.009\Delta G_{OH} + 1.221$    | 0.005                |
| COH             | $\Delta G_{CHO} = 0.303\Delta G_{OH} + 2.314$   | 0.0674               |

3  
4  
5  
6  
7

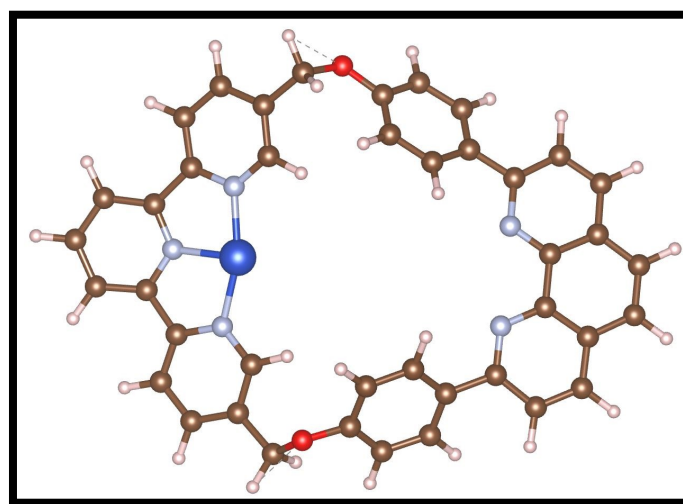

8  
9 **Figure S1.** The structure of one individual macrocycle denoted as M(I or II)<sub>CN<sub>x</sub>=2,3</sub> where M  
10 indicates the 3d transition metals.

11

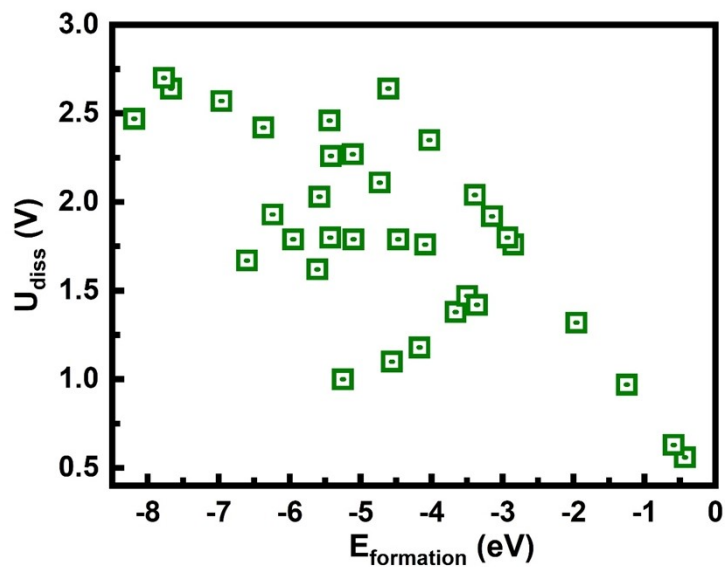

1

2 **Figure S2.** Dissolution potential versus formation energies of  $M(\text{I or II})_{\text{CN}_x=2,3,4,5,6}$ , indicating  
 3 that all candidates meet the stability criteria ( $U_{\text{diss}} > 0$  and  $E_{\text{formation}} < 0$ ).

4

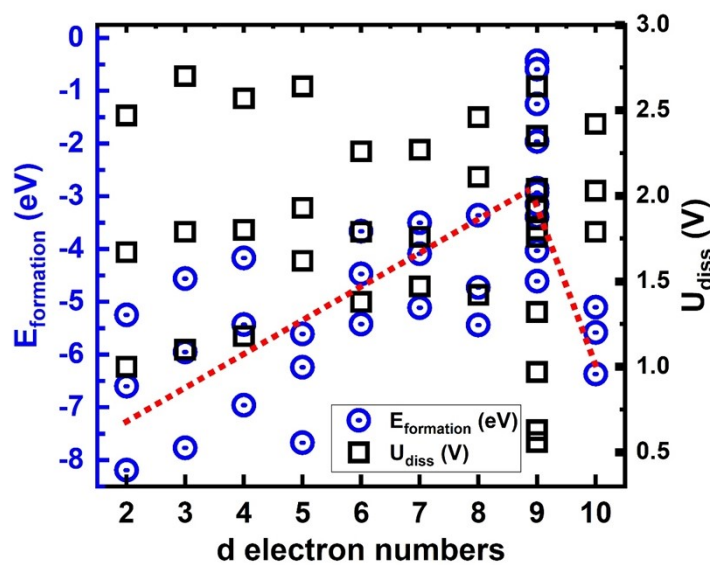

5

6 **Figure S3.** DFT-calculated formation energies and dissociation potentials versus the d electron  
 7 numbers.

8

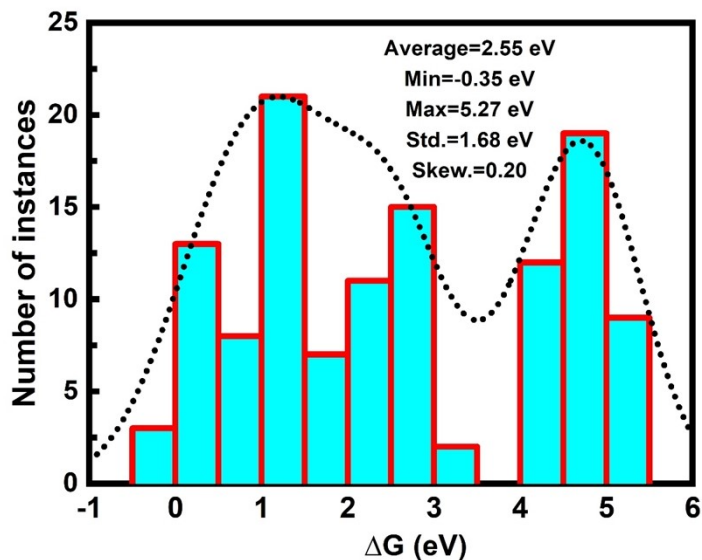

1

2 **Figure S4.** The histogram of Gibbs free energies variation obtained from DFT-D3 calculations,  
 3 containing 108 data points with an average of 2.55 eV and a standard deviation (std.) of 1.68 eV.

4

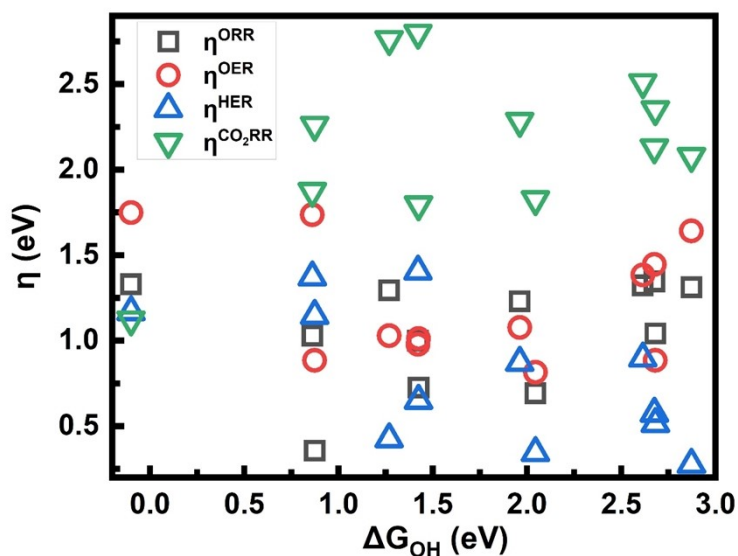

5

6 **Figure S5.** DFT-calculated CO<sub>2</sub>RR, HER, ORR, and OER overpotentials versus ΔG<sub>OH</sub>.

7

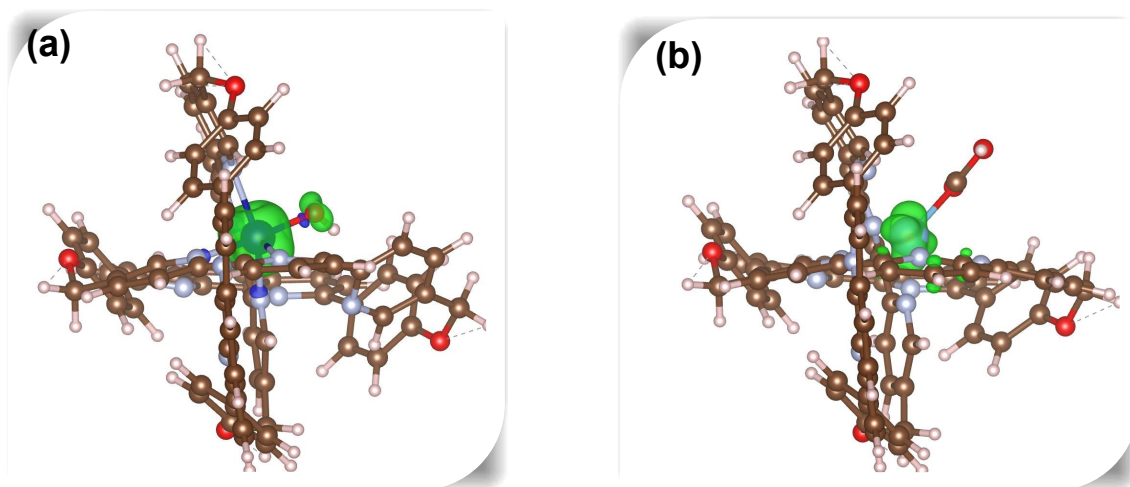

1

2 **Figure S6.** The spin density of (a) Cr(II)<sub>CN<sub>6</sub></sub> with OH intermediate and (b) Ti(II)<sub>CN<sub>6</sub></sub> with COOH  
 3 intermediate (Isosurface value = 0.01 e/Å<sup>3</sup>).

4

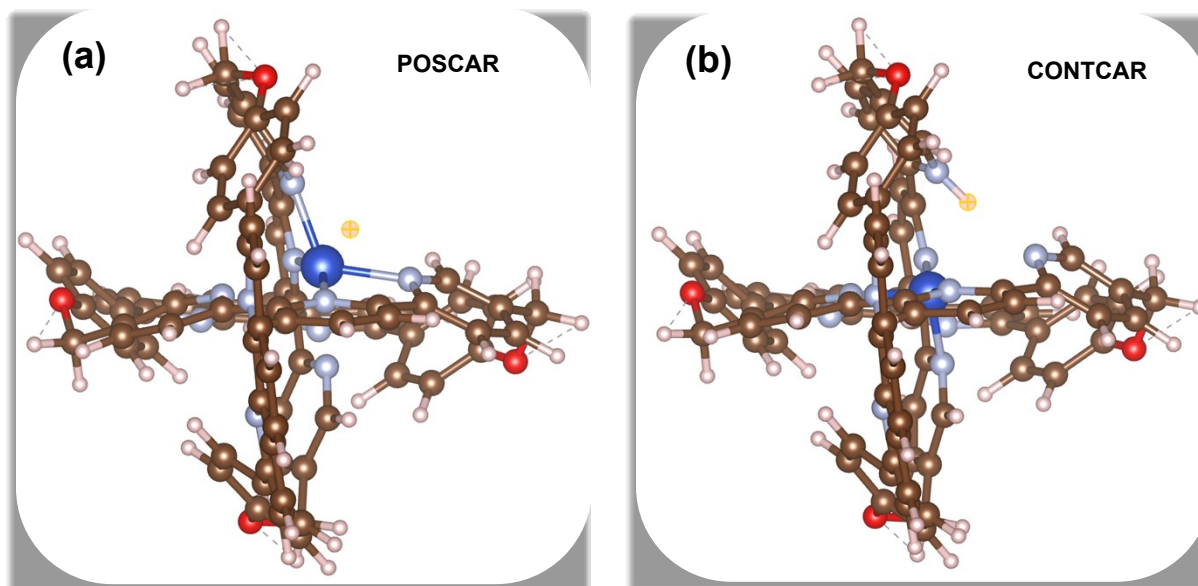

5

6 **Figure S7.** (a) Initial structure (POSCAR file) and (b) final structure (CONTCAR file) for the  
 7 adsorption of H intermediate on Cu(II)<sub>CN<sub>6</sub></sub> catalyst.

8

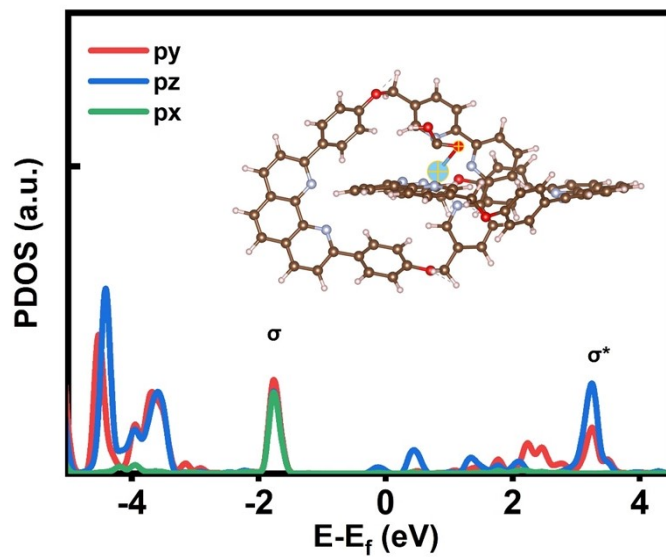

1  
2 **Figure S8.** Partial density of states (PDOS) of  $p_y$ ,  $p_z$ , and  $p_x$  orbitals of O atom in COOH  
3 intermediate adsorbed on  $\text{Ti(II)}_{\text{CN}_6}$ .  
4

```

1  CONTCAR file of Co(II)CN6
2
3  Co(II)CN6
4  1.0000000000000000
5  27.9549999237100018  0.0000000000000000  0.0000000000000000
6  0.0000000000000000  21.5499992370999998  0.0000000000000000
7  0.0000000000000000  0.0000000000000000  21.5499992370999998
8  C  H  N  O  Co
9  82 54 10  4  1
10 Direct
11 0.2551397081870034 0.4319639195553442 0.6592268169937268
12 0.2070414883848525 0.4456554799842708 0.6593401952858627
13 0.1918091312758141 0.5073090601659493 0.6489316214814486
14 0.2278677475940968 0.5530873119079740 0.6382977967586292
15 0.2884070481097165 0.4800918997512013 0.6467543551271584
16 0.1423240837991926 0.5239922705625937 0.6498017447171746
17 0.2133261232063640 0.6177187807582982 0.6321031681993136
18 0.1635507422344519 0.6322947100392560 0.6349408220280462
19 0.1286783794994652 0.5843999598884133 0.6426144388979850
20 0.1505087020698417 0.6955671769397080 0.6315263607185273
21 0.1855160687610566 0.7404152722248415 0.6283224948149386
22 0.2341629308161325 0.7217391077328924 0.6271582438995129
23 0.2726338583623110 0.7689424723725943 0.6287713385845460
24 0.2692208558281505 0.8192793023049899 0.6700989537004052
25 0.3137997531489154 0.7636979102326013 0.5921557722112570
26 0.3063136921553538 0.8616372798746371 0.6762126720440612
27 0.3511240169287922 0.8065319905574838 0.5969213949766677
28 0.3475520028203761 0.8551498674591202 0.6398961893894488
29 0.3402106380980190 0.4658896287232829 0.6439201497442937
30 0.3692072204625758 0.4931212897012536 0.5982802704039177
31 0.3613492788450347 0.4240690816242064 0.6857024532135990
32 0.4176385860822560 0.4788177219424865 0.5940688420785570
33 0.4099296362063278 0.4098691817068529 0.6824752791760487
34 0.4381496403969138 0.4371199655872322 0.6362089467202376
35 0.6108973469004452 0.6575121666801430 0.6695982250685198
36 0.5889120126971856 0.7619660135999371 0.6567273210406800
37 0.6368420252671088 0.7793816947324661 0.6500209801842346
38 0.6720747311239442 0.7337116479313065 0.6537930024805142
39 0.6594264644339057 0.6717810051206435 0.6627442121593006
40 0.4645107571865392 0.8126740644066016 0.6528472500718868
41 0.4653282778199072 0.8712526998833956 0.6245546960199083
42 0.5101021523672350 0.8966031267945036 0.6105352649456937
43 0.5514353112143434 0.8630142386400987 0.6230116738953687
44 0.5474784449405364 0.8036948322417452 0.6486806479776448
45 0.5448135954128289 0.4812073019740373 0.6824112417806515
46 0.5210061524203848 0.5377679069042313 0.6906960784013720
47 0.5908609137961882 0.5947227648699528 0.6759821407894704
48 0.6174051045616382 0.5403054545172298 0.6681955484402291
49 0.5940845224310893 0.4832855405088881 0.6711101256293269
50 0.4204692785611734 0.9063535233446242 0.6079039900893568
51 0.5166479771289307 0.4215923811924909 0.6811866119595825

```



1 0.7838237045103960 0.6612400878706932 0.4717676185174718  
2 0.8299940687446115 0.6615559603523472 0.4939628826338808  
3 0.8383071658476836 0.6543582483762490 0.5582271567120509  
4 0.7976974306531103 0.6446613126716774 0.5972690928445185  
5 0.7455265984739510 0.6520849663964859 0.5139926587414471  
6 0.8853672959642677 0.6582616185966484 0.5838252598624046  
7 0.8053020450292336 0.6400188310876215 0.6639980381001065  
8 0.8527430820901685 0.6473001925526926 0.6875972137317212  
9 0.8923396455965644 0.6552617556607685 0.6464306445984780  
10 0.8586812204415710 0.6472713437690497 0.7527004761177466  
11 0.8194025239661372 0.6408230586524528 0.7907066924267221  
12 0.7738107752614755 0.6323620948349862 0.7632388766697312  
13 0.7309321309673791 0.6241186898301504 0.8026555419524783  
14 0.6968792298593407 0.5785437563093130 0.7882224178061402  
15 0.7230546505807409 0.6618933349977462 0.8546584996322912  
16 0.6555763432527273 0.5716866152091702 0.8235715745932067  
17 0.6816228283956879 0.6559693108781256 0.8901727038240586  
18 0.6475349686306746 0.6111459403314377 0.8741419347690479  
19 0.6956157980597032 0.6541284846058678 0.4911059946910390  
20 0.6818967711929285 0.6992019065793941 0.4473387295489409  
21 0.6608389158883021 0.6124537119972205 0.5122791749581717  
22 0.6349873133489153 0.7034661307815766 0.4266486376902167  
23 0.6137041845224818 0.6151960147017369 0.4908766119129804  
24 0.6005458975036958 0.6615115188959541 0.4484405237039826  
25 0.4068262573957501 0.6525796518675167 0.6550981923602652  
26 0.4202203037385202 0.6615624933977271 0.7621249448053111  
27 0.3716705002068703 0.6512275311805165 0.7745669591653420  
28 0.3406187876585383 0.6412873208528704 0.7250172041149521  
29 0.3581838695451861 0.6408875178451802 0.6644592864553324  
30 0.5405728906193550 0.6715174207643885 0.8245588165040506  
31 0.5359858255212685 0.6626909213874974 0.8886744628894822  
32 0.4897173829407801 0.6573590074196248 0.9126913428449172  
33 0.4505193163245678 0.6596491863565326 0.8729401647378771  
34 0.4581766033890778 0.6662213597015652 0.8092015908620509  
35 0.4874556672307305 0.6359897400348383 0.4894363208634547  
36 0.5066285184495150 0.6510409569631087 0.5474677624944088  
37 0.4315851873568355 0.6501421138943964 0.5949900364257823  
38 0.4093817896923330 0.6386223902609548 0.5379953115213960  
39 0.4375658890291144 0.6310867547910419 0.4852574834063236  
40 0.5798731446563000 0.6550677921318488 0.9286120789464345  
41 0.5190525766159421 0.6247957839230728 0.4337750018445315  
42 0.1126973467423727 0.7082234991422495 0.6322909868127077  
43 0.1158204851880527 0.4875311643931119 0.6569987303187346  
44 0.2676768938108443 0.3846709146875468 0.6665801288178429  
45 0.1803871725697841 0.4095344570426734 0.6674146337010294  
46 0.0909528266269670 0.5973788080514711 0.6439147623602552  
47 0.1763750242687732 0.7894969079981776 0.6259754690162518  
48 0.2374709439628700 0.8243709834536035 0.6990707079228541  
49 0.3163651547792173 0.7256261742799194 0.5590104290875613  
50 0.3042059200952411 0.9001469460585658 0.7088522773263101  
51 0.3825863792253796 0.8011744336403809 0.5674588238764759

1 0.3528035832289828 0.5250308103775166 0.5653233199800570  
2 0.3395745005377329 0.4024455219602213 0.7217414034433363  
3 0.4401366470633388 0.4988452634906859 0.5579026770707149  
4 0.4252619732897984 0.3766208882544763 0.7150247253422291  
5 0.6465046957740046 0.8275959603268505 0.6416530563291919  
6 0.7097846956132829 0.7453866987725941 0.6485454818797172  
7 0.6880387333995736 0.6373317773918713 0.6640113057857923  
8 0.4307818593268301 0.7913057501118856 0.6667313517040313  
9 0.5125922927523774 0.9425347290865960 0.5894857328267744  
10 0.5863614225090475 0.8822609263116326 0.6115705172305721  
11 0.4825221704920811 0.5390668414417523 0.6994014854179730  
12 0.6556177764025921 0.5429678594173127 0.6587779149605424  
13 0.6140544159268140 0.4403673473881158 0.6639291421891986  
14 0.4085293441438662 0.8936711083923505 0.5607199111676279  
15 0.4282768967021303 0.9563742511332451 0.6074383403472623  
16 0.4956982710534734 0.4158115621172034 0.7239984204756624  
17 0.5405504724407589 0.3815082895976575 0.6762217390326604  
18 0.8945068352370360 0.6525882263334847 0.7721329864361908  
19 0.9154391980314761 0.6649054058286746 0.5521698884197194  
20 0.7765189486490062 0.6667026280242748 0.4224128004723751  
21 0.8603141063898524 0.6679810847966329 0.4627282647951427  
22 0.9281099088854688 0.6595620202202513 0.6662396647900988  
23 0.8231028759821336 0.6404129246300043 0.8410455802447270  
24 0.7036033968681266 0.5479823416705656 0.7488877458395953  
25 0.7492565190126929 0.6972895748991739 0.8671605489887206  
26 0.6291502652290278 0.5360296982946854 0.8128812284258025  
27 0.6765178566304461 0.6857231864277955 0.9305500801655597  
28 0.7082584051620321 0.7324095350592343 0.4302807920448180  
29 0.6711891644746271 0.5767062624404932 0.5454645433106445  
30 0.6241558877517496 0.7388766911454183 0.3933932680485523  
31 0.5879617198871792 0.5810069543485591 0.5075252991522277  
32 0.3585805105863984 0.6498657871210014 0.8221427053358611  
33 0.3026895320786273 0.6325146293035054 0.7324028777360415  
34 0.3330797440748780 0.6304020913247913 0.6272547744057981  
35 0.5758315617311548 0.6759872378411423 0.8032082354078043  
36 0.4844418526722776 0.6501852110494459 0.9623466891451928  
37 0.4144107026219100 0.6544511956065110 0.8911609700813744  
38 0.5449554383983929 0.6581511418652304 0.5535345019063252  
39 0.3705970835079456 0.6346231359777887 0.5353149856764517  
40 0.4207760751226425 0.6211140132008608 0.4406295210454261  
41 0.6022739397632813 0.6969532851931519 0.9269279130488743  
42 0.5696647233785781 0.6467187423593953 0.9770891162991614  
43 0.5354137370635815 0.5782316736613767 0.4360591037978293  
44 0.4973133386802275 0.6265789067220393 0.3913279205581995  
45 0.2474330497810332 0.6621640595851918 0.6272944713783268  
46 0.2750086392393100 0.5386541523881789 0.6361433807000367  
47 0.5770758581322637 0.7024296256250295 0.6679794080068459  
48 0.5041962531769494 0.7794536994363928 0.6637821449908805  
49 0.5429828195652665 0.5927555496815636 0.6869053264166874  
50 0.7671717915183408 0.6313571331445782 0.7018242702153368  
51 0.7524653272437886 0.6427669392851616 0.5746604179141795

1 0.4365578416566048 0.6638329576824743 0.7033391867715469  
2 0.5031121247917952 0.6728147504221674 0.7858748451015892  
3 0.4797734012688764 0.6572087326908689 0.5985051324361286  
4 0.3826401599440936 0.8984571346877793 0.6513860669358161  
5 0.4858088201482318 0.4223682462382006 0.6275230454053735  
6 0.6060449113391106 0.6015147990561555 0.9075917155086377  
7 0.5550593065297136 0.6712474632821418 0.4260019535511412  
8 0.5078248565506275 0.6802740080925908 0.6868670891340038

9

10

11

12

13 **References**

14 1 F. Rehman, S. Kwon, C. B. Musgrave, M. Tamtaji, W. A. Goddard III and Z. Luo, *Nano*  
15 *Energy*, 2022, **103**, 107866.

16
